# Supplementary material for: Composition and Comparison of the Ocular Surface Microbiome in Infants and Older Children
Source: PubMed Central journal article supplement — Transl Vis Sci Technol. 2018 Nov 30;7(6):16. doi: 10.1167/tvst.7.6.16 (PMC6269136; doi:10.1167/tvst.7.6.16), 2018-11-30

Supplementary Figure S1.  
Bar plot summarizing the taxonomic classification success of sequences for all samples, showing a high percentage of classification for kingdom, phylum, class, order, family and genus.

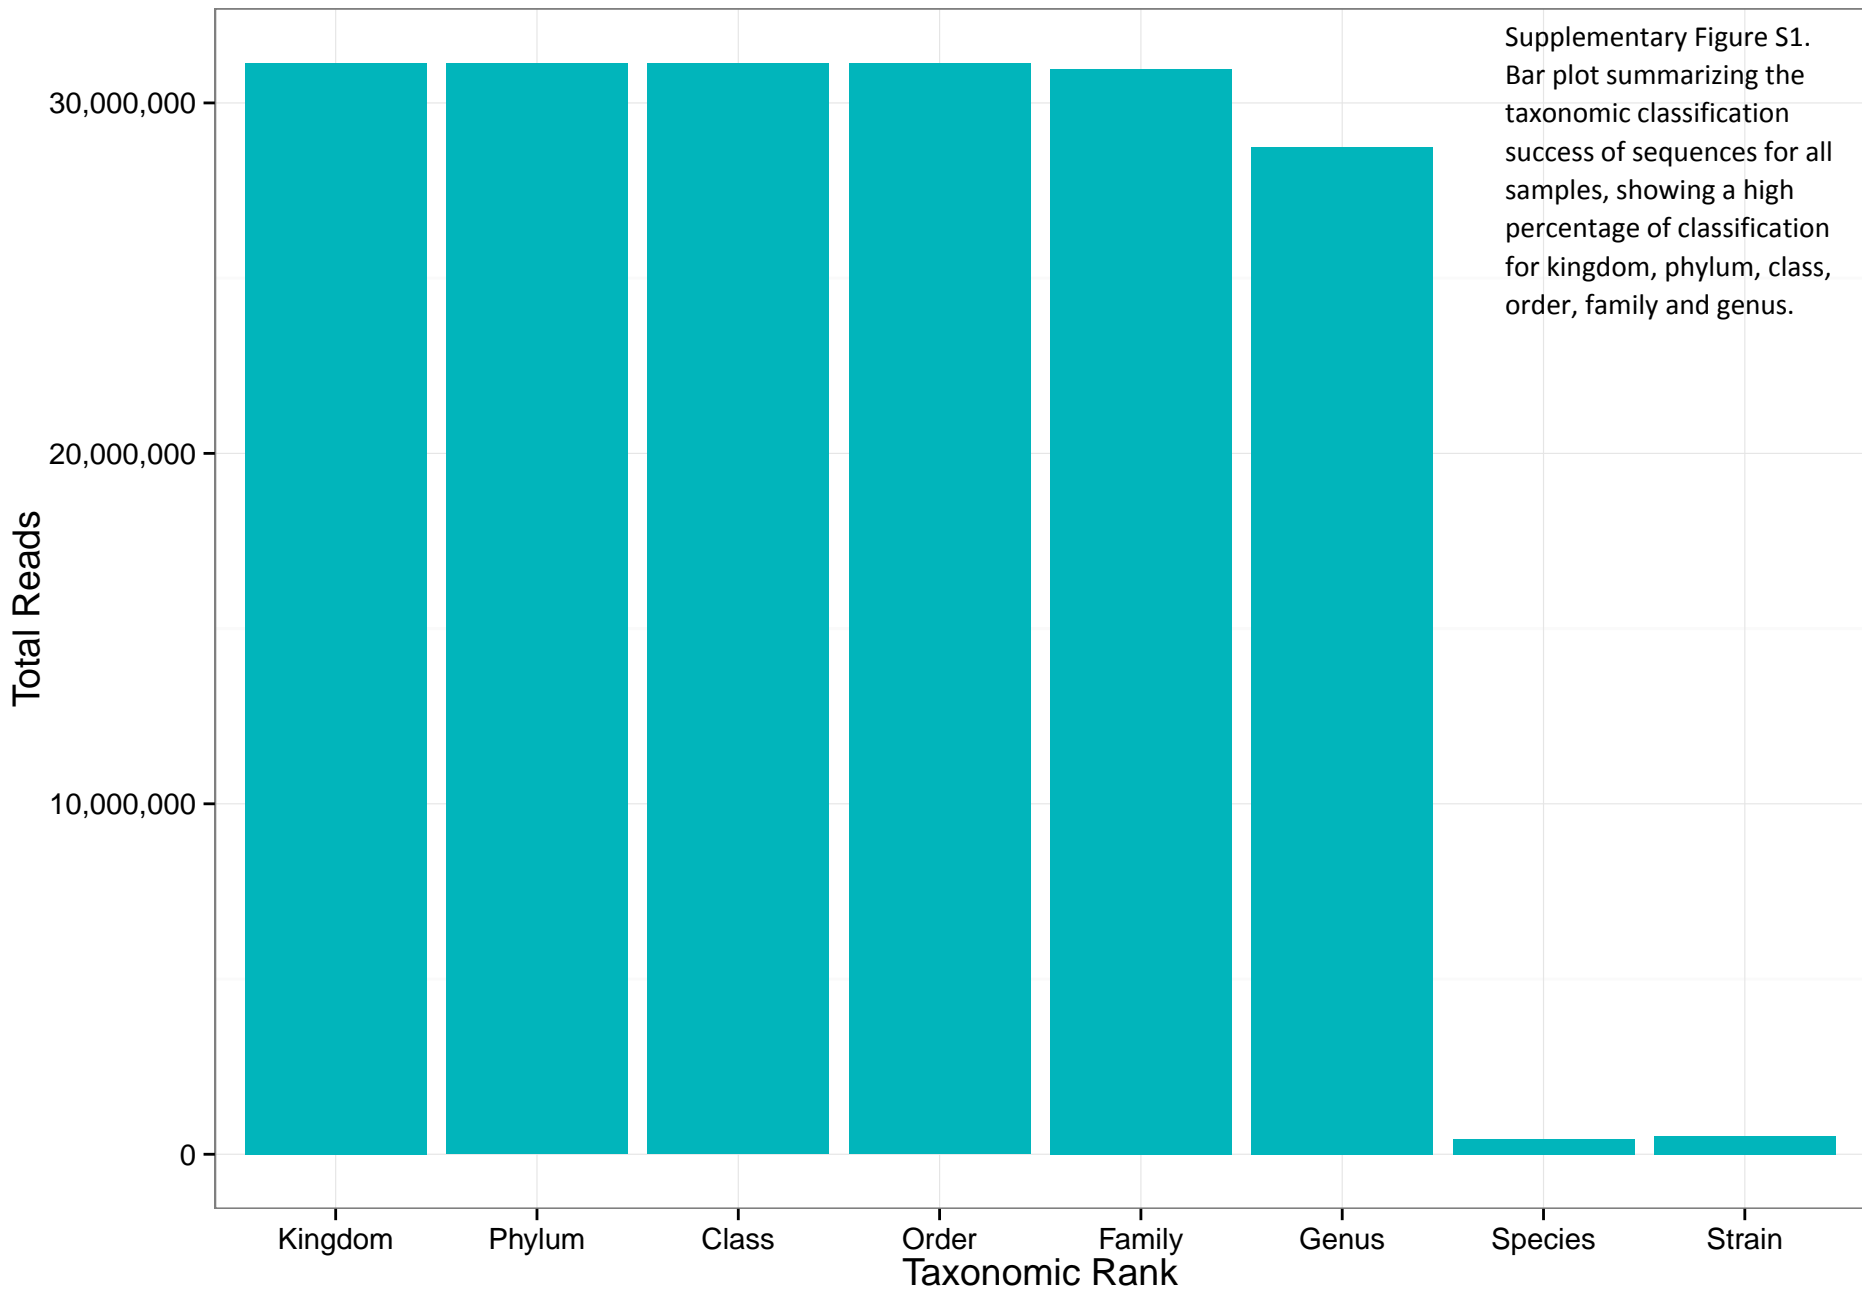

Supplement: tvst-07-06-14_s01.pdf [file tvst-07-06-14_s01.pdf]
