# Supplementary material for: Composition and Comparison of the Ocular Surface Microbiome in Infants and Older Children
Source: PubMed Central journal article supplement — Transl Vis Sci Technol. 2018 Nov 30;7(6):16. doi: 10.1167/tvst.7.6.16 (PMC6269136; doi:10.1167/tvst.7.6.16), 2018-11-30

Supplementary Figure S3. Weighted ordination of the microbiome samples from the eyes, nose and throat showing distinction between the anatomic sites using the PCoA ordination method.

**Location**

- L eye
- Nose
- R eye
- Throat

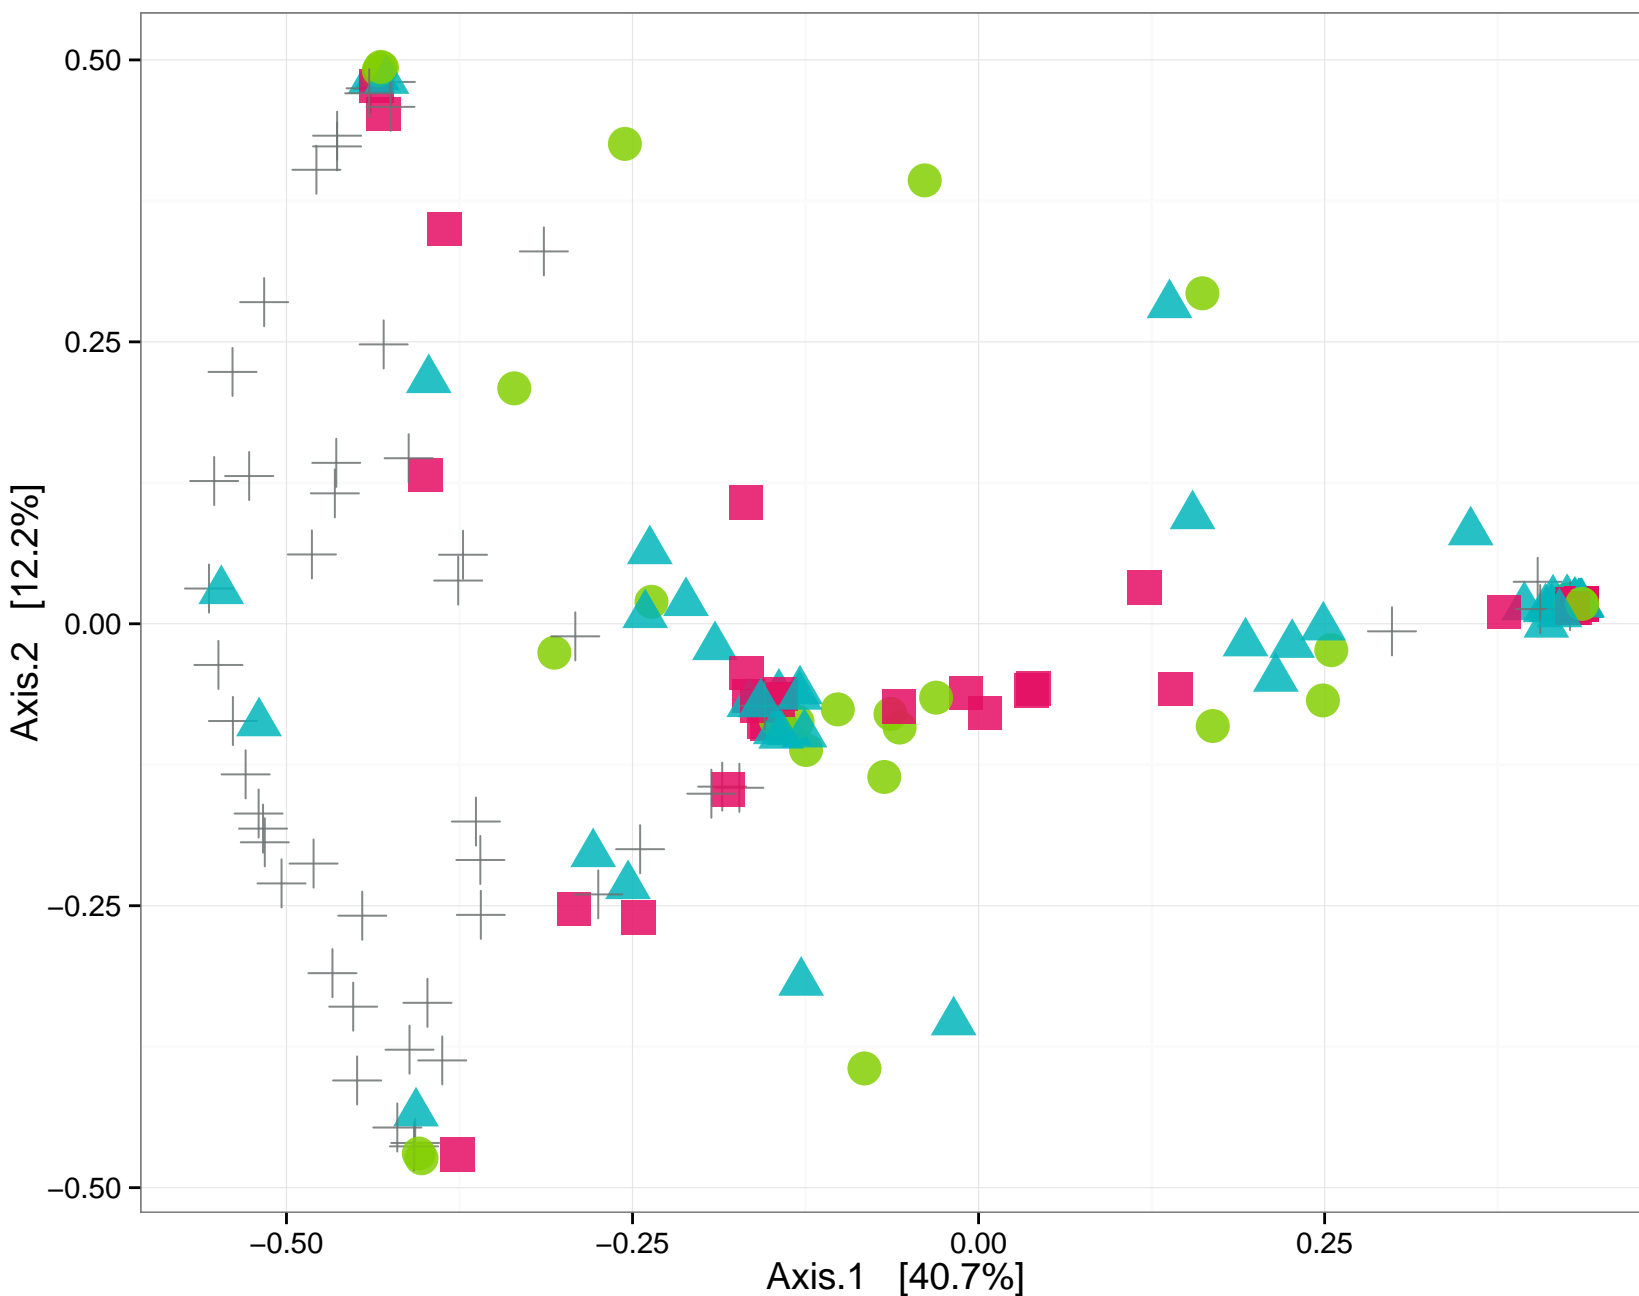

Supplement: tvst-07-06-14_s03.pdf [file tvst-07-06-14_s03.pdf]
