# Supplementary figures and images for: Composition and Comparison of the Ocular Surface Microbiome in Infants and Older Children
Source: PubMed Central journal article supplement — Transl Vis Sci Technol. 2018 Nov 30;7(6):16. doi: 10.1167/tvst.7.6.16 (PMC6269136; doi:10.1167/tvst.7.6.16), 2018-11-30

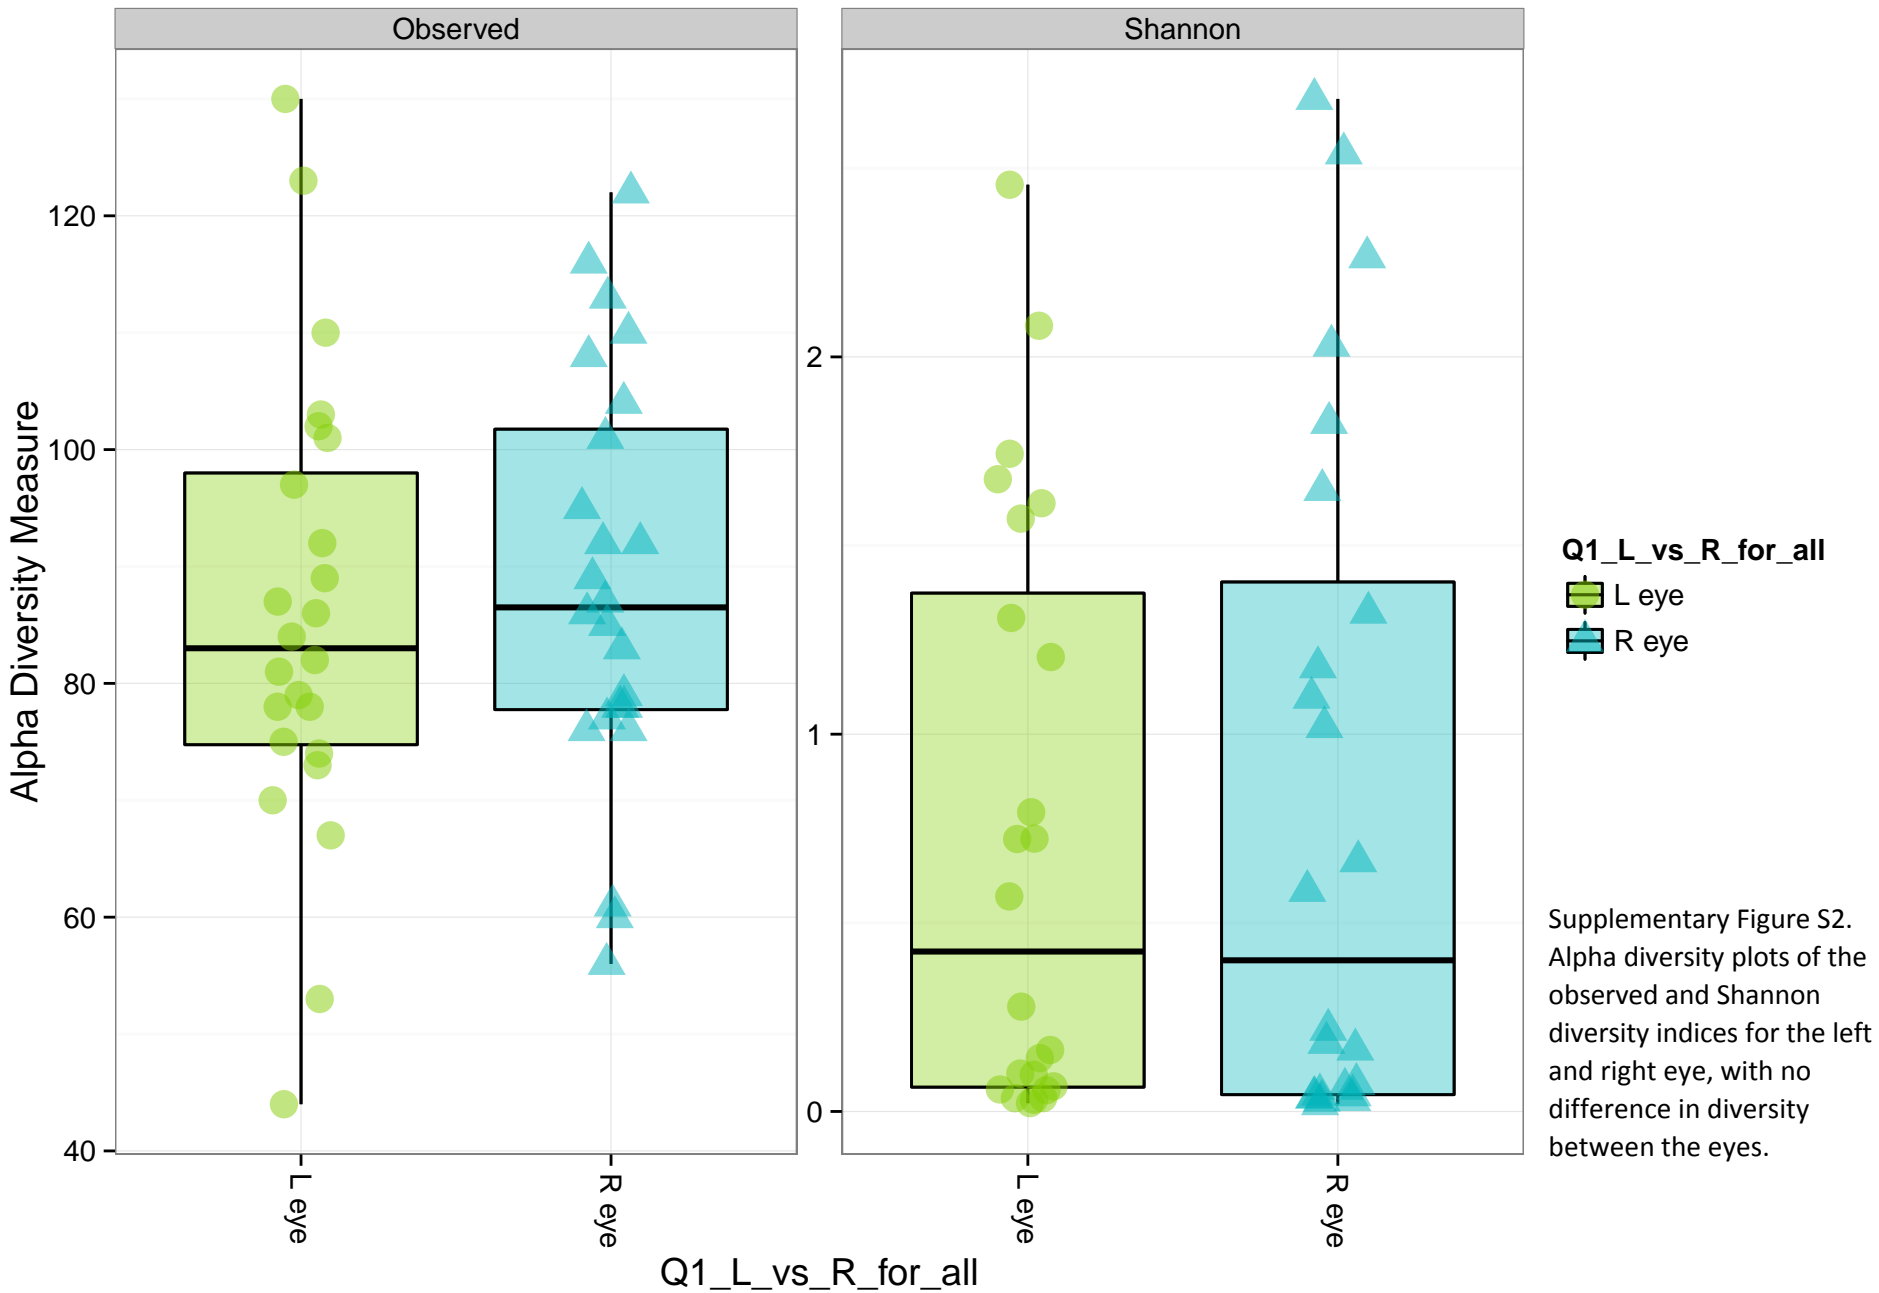

Supplement: tvst-07-06-14_s02.pdf [file tvst-07-06-14_s02.pdf]
